# Supplementary material
Source: Springer Nature journal article supplement (https://www.springermedizin.de/resource/supplementary/13046_2009_176_MOESM2_ESM.pdf/9661792)

Begg's funnel plot with pseudo 95% confidence limits

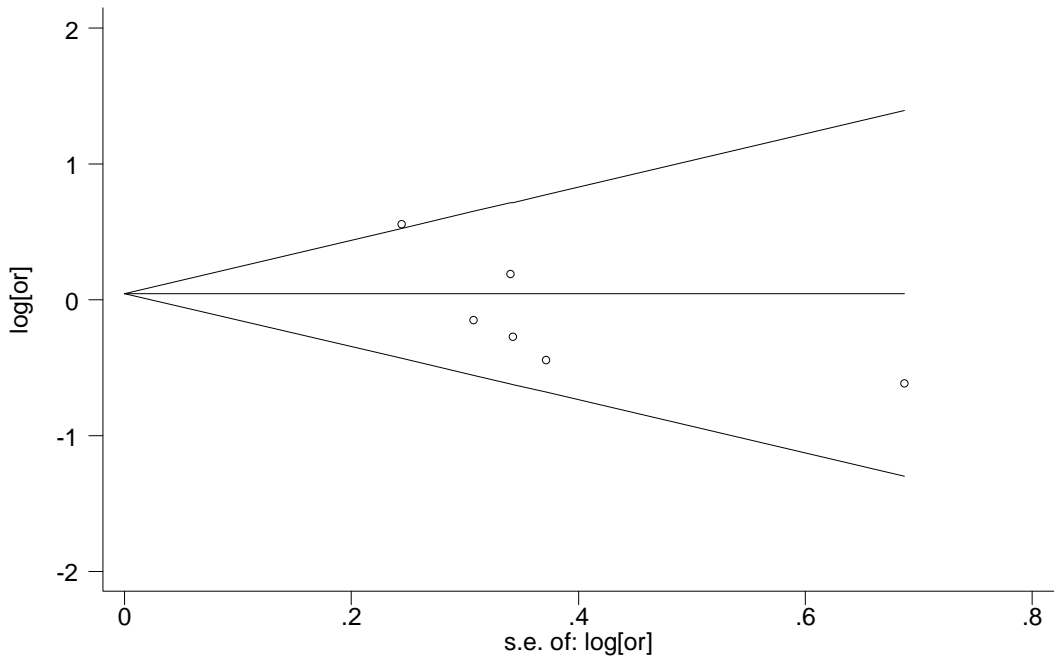

Supplement: MOESM2 [file 9661792]
